# Supplementary material
Source: Research Square preprint supplement (doi:10.21203/rs.3.rs-9182117/v1)
Supplement: Supplementary file 1 [file 76c449e35696a69254d94bf3.docx]

| **Supplementary Table 1. Comparison Between Single- and Two-Needle Intervention Groups (Groups 1 and 2)** | | | |
| --- | --- | --- | --- |
| **Variable** | **Group 1**  **(n = 43)1** | **Group 2**  **(n = 51)1** | **p2** |
| **Tumor size (mm)** | 14.93 ± 5.08 | 13.51 ± 4.53 | 0.16 |
| **Interval between PTH-WO and surgery (days)** | 63.00 (28.00–131.00) | 54.00 (23.00–126.00) | 0.38 |
| **Parathyroid hormone (pg/mL)** | 158.00 (125.00–245.00) | 123.00 (89.60–153.00) | **0.024** |
| **Serum calcium (mg/dL)** | 11.51 ± 2.35 | 11.11 ± 0.60 | 0.28 |
| **Vitamin D (ng/mL)** | 17.85 ± 9.21 | 17.47 ± 6.92 | 0.83 |
| **Presence of fibrosis** | 13 (30.23%) | 6 (11.76%) | **0.026** |
| **Fibrosis percentage2** | 2.00 (2.00–2.00) | 2.00 (1.00–10.00) | 0.29 |
| **Thick fibrous capsule** | 4 (9.30%) | 4 (7.84%) | >0.99 |
| **Fibrous bands** | 11 (25.58%) | 2 (3.92%) | **0.002** |
| **Hemorrhage** | 22 (51.16%) | 31 (60.78%) | 0.35 |
| **Hemosiderin deposition** | 4 (9.30%) | 3 (5.88%) | 0.70 |
| **Capsular pseudoinvasion** | 3 (6.98%) | 2 (3.92%) | 0.66 |
| **Tumor implantation** | 2 (4.65%) | 1 (1.96%) | 0.59 |
| **Granulation tissue** | 0 (0.00%) | 1 (1.96%) | >0.99 |
| **Edema** | 8 (18.60%) | 4 (7.84%) | 0.12 |
| **Necrosis** | 1 (2.33%) | 0 (0.00%) | 0.46 |
| **1**Continuous variables are presented as mean ± standard deviation or median (Q1–Q3), and categorical variables are presented as n (%), according to data distribution.  **2**Pearson’s chi-square test, Welch’s two-sample t-test, and Fisher’s exact test  3The percentage of stromal fibrosis was calculated only in the 28 adenomas presenting with fibrosis.  Bold p-values indicate statistical significance (p < 0.05).  **Group 0:** needle-naive group (PTH-WO not performed), **Group 1:** single-needle group (PTH-WO performed once), **Group 2:** two-needle group (two needle interventions performed for diagnostic and preoperative radioguided localization purposes), PTH-WO: parathyroid hormone washout | | | |
